# Supplementary material for: Age-adjusted association of homologous recombination genes with ovarian cancer using clinical exomes as controls
Source: Hered Cancer Clin Pract. 2019 Jul 15;17:19. doi: 10.1186/s13053-019-0119-3 (PMC6631909; doi:10.1186/s13053-019-0119-3)
Supplement: Supplementary file 5 — Serous-subtype ovarian cancer sensitivity analysis. Results when limited to women with serous-subtype ovarian cancer. (DOCX 14 kb) [file 13053_2019_119_MOESM5_ESM.docx]

**Additional file 5: Table S4.** Associations of Serous-Subtype Ovarian Cancer with Pathogenic Variants in Homologous Recombination Genes among Self-Reported White Women.

| Gene | Median Age of PV Carriers (Casesa, Controlsb) | Crude Odds Ratio (CI) | p-value, Crudec | Adjusted Odds Ratio (CI) | p-value, Adjustedc | Case Carriers, No. (Non-Carriers)d | Control Carriers, No.  (Non-Carriers) | p-value, z-teste |
| --- | --- | --- | --- | --- | --- | --- | --- | --- |
| *ATM* | 60.0, 47.0 | 1.31. (0.57 to 2.83) | 0.70 | 0.61 (0.21 to 1.66) | 0.57 | 9 (1939) | 17 (4673) | 0.14 |
| *BARD1* | 66.0, 34.5 | 1.66 (0.15 to 12.46) | 0.70 | 4.32 (0.06 to 70.12) | 0.77 | 1 (1698) | 2 (4688) | 0.70 |
| *BRCA1* | 54.0, 37.0 | 50.11 (21.93 to 151.24) | 5.12x10-47 | 87.66 (36.52 to 272.70) | 4.36x10-47 | 115 (2400) | 4 (4686) | 0.73 |
| *BRCA2* | 63.0, 40.0 | 11.16 (6.97 to 18.92) | 4.23x10-31 | 8.50 (4.77 to 15.87) | 1.61x10-14 | 106 (2409) | 18 (4672) | 0.23 |
| *BRIP1* | 65.0, 46.0 | 2.92 (1.47 to 5.91) | 4.74x10-03 | 1.25 (0.50 to 3.19) | 0.77 | 18 (2044) | 14 (4676) | 0.07 |
| *CHEK2* | 63.5, 42.0 | 1.09 (0.53 to 2.12) | 0.81 | 1.66 (0.63 to 4.02) | 0.57 | 12 (2006) | 24 (4287) | 0.77 |
| *NBN* | 60.5, 37.0 | 0.71 (0.13 to 2.49) | 0.70 | 0.93 (0.14 to 4.95) | 0.94 | 2 (1744) | 9 (4681) | 0.65 |
| *PALB2* | 66.0, 39.0 | 2.24 (0.79 to 6.30) | 0.21 | 1.52 (0.35 to 7.20) | 0.77 | 7 (2094) | 7 (4683) | 0.34 |
| *RAD51C* | 58.0, 39.0 | 12.92 (2.91 to 121.42) | 8.61x10-04 | 11.38 (1.84 to 131.62) | 0.02 | 8 (2056) | 1 (4689) | 0.38 |
| *RAD51D* | 59.0, 32.5 | 10.51 (3.10 to 54.13) | 2.11x10-04 | 25.28 (4.84 to 165.13) | 2.92x10-04 | 11 (2051) | 2 (4688) | 0.72 |

aAge (in years) at time of ovarian cancer diagnosis

bAge (in years) at time of testing

cCorrected for False Discovery Rate

dAll genes were not tested for every sample

eComparing crude odds ratio to adjusted odds ratio

CI = Confidence Interval

No. = Number
